# Supplementary material for: In situ polymerization of EDOT onto sulfonated onion-like carbon for efficient pseudocapacitor electrodes
Source: Royal Society of Chemistry journal article supplement (doi:10.1039/d4ya00048j), 2024-01-01
Supplement: d4ya00048j1.pdf [file d4ya00048j1.pdf]

## Supporting information

### ***In situ* polymerization of EDOT onto sulfonated onion-like carbon for efficient pseudocapacitor electrodes**

Christian Bauer,<sup>1</sup> Maximilian Kirchner,<sup>1</sup> Anke Krueger<sup>\*1,2</sup>

<sup>1</sup> Institute for Organic Chemistry, Julius-Maximilian University Würzburg, Am Hubland, 97074 Würzburg, Germany

<sup>2</sup> Institute of Organic Chemistry, University of Stuttgart, Pfaffenwaldring 55, 70569 Stuttgart, Germany

### **Polymerization of EDOT to PEDOT@SPOLC, PEDOT@SPOLC/OLC and PEDOT@OLC**

EDOT was distilled in vacuo prior to use. To produce **PEDOT@SPOLC**, EDOT (288 mg) was dispersed in aqueous **SPOLC** suspension (4 mL, 576 mg, 14 wt%) after the addition of ethanol (3 mL). For **PEDOT@OLC**, pristine OLC (1 g) and EDOT (570 mg) was dispersed in a mixture of water (4 mL) and ethanol (3 mL). For **PEDOT@SPOLC/OLC**, EDOT (575 mg) and pristine **OLC** (570 mg) was dispersed in aqueous **SPOLC** (4 mL, 576 mg, 14 wt%) with the addition of ethanol (3 mL).

To polymerize EDOT, an aqueous solution of sodium persulfate Na<sub>2</sub>S<sub>2</sub>O<sub>8</sub> (2.4 M) was added dropwise to a solution with an EDOT : Na<sub>2</sub>S<sub>2</sub>O<sub>8</sub> ratio of 1 : 2. After 24 hours of vigorous stirring using a hand-held coiled wire stirrer (i.e. a cappuccino creamer). The resulting mixture was centrifuged (6000 rpm, 20 minutes) and the supernatant subsequently removed. The particles were redispersed and centrifuged six more times, alternating between ethanol and water as solvents.

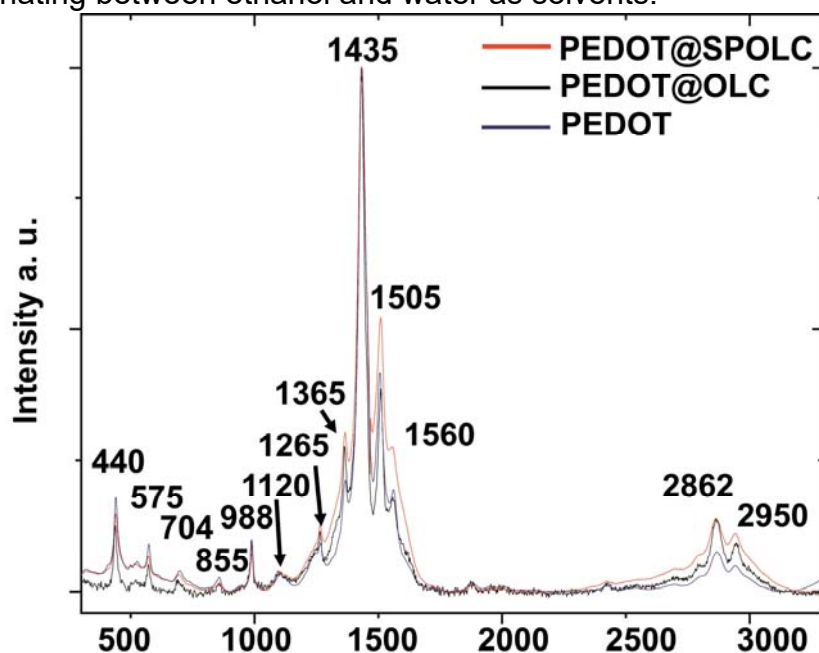

**Fig. S1:** Raman spectra of **PEDOT@SPOLC**, **PEDOT@OLC** and **PEDOT** (excitation wavelength: 532 nm).

**Tab. S1:** Assignment of Raman modes for functional groups of PEDOT

| Raman shift (cm <sup>-1</sup> ) | Assignment                              |
|---------------------------------|-----------------------------------------|
| 440, 575, 988                   | oxy- ethylene ring CO deformation       |
| 1128                            | C-O-C deformation                       |
| 1265                            | CaCa stretching and CH bending          |
| 1435, 1405, 1560                | symmetric and asymmetric C=C stretching |
| 1365                            | thiophene ring CβCβ stretching          |
| 2870, 2965                      | OH and CH stretching                    |

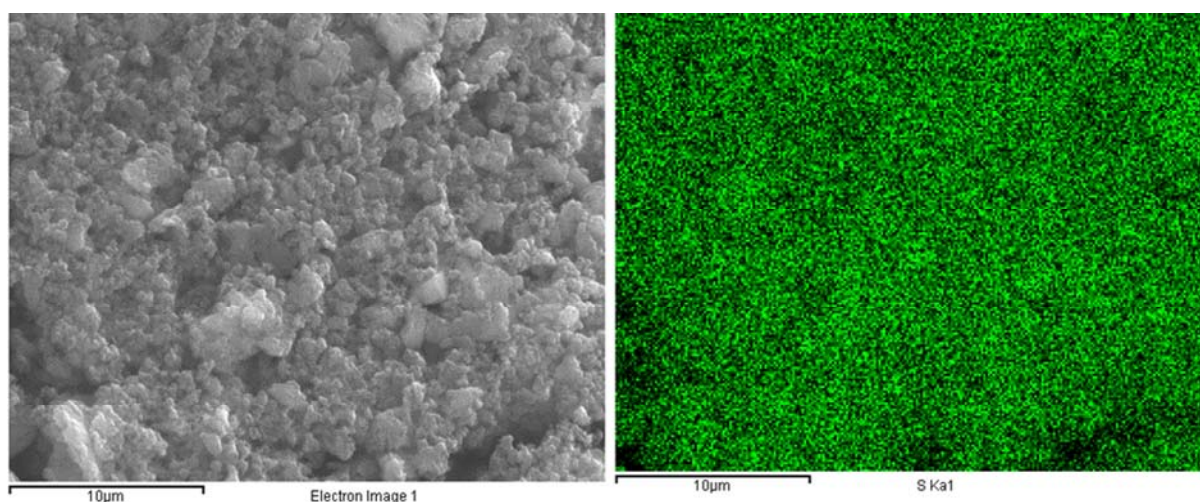

**Fig. S2:** SEM picture (left) and its corresponding EDX measurement (tracking sulfur) for the **PEDOT@SPOLC** composite.

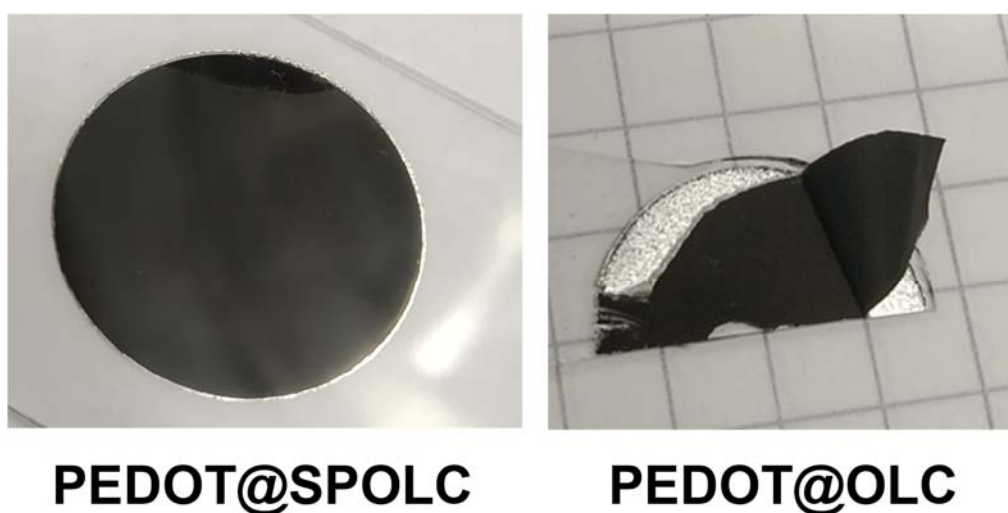

**Fig. S3:** Differences in electrode manufacturing of **PEDOT@SPOLC** and **PEDOT@OLC**, where **PEDOT@OLC** shows delamination despite the identical electrode manufacturing procedure. Variations also did not lead to improved electrode characteristics.

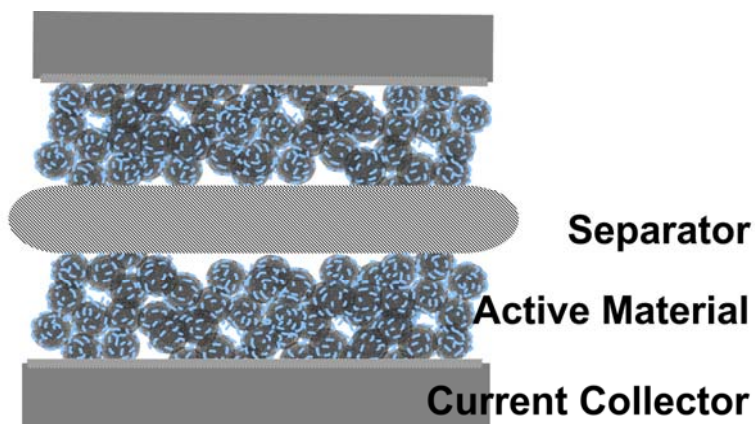

**Fig. S4:** Schematic overview of a symmetric supercapacitor setup with separator, active material and current collector.

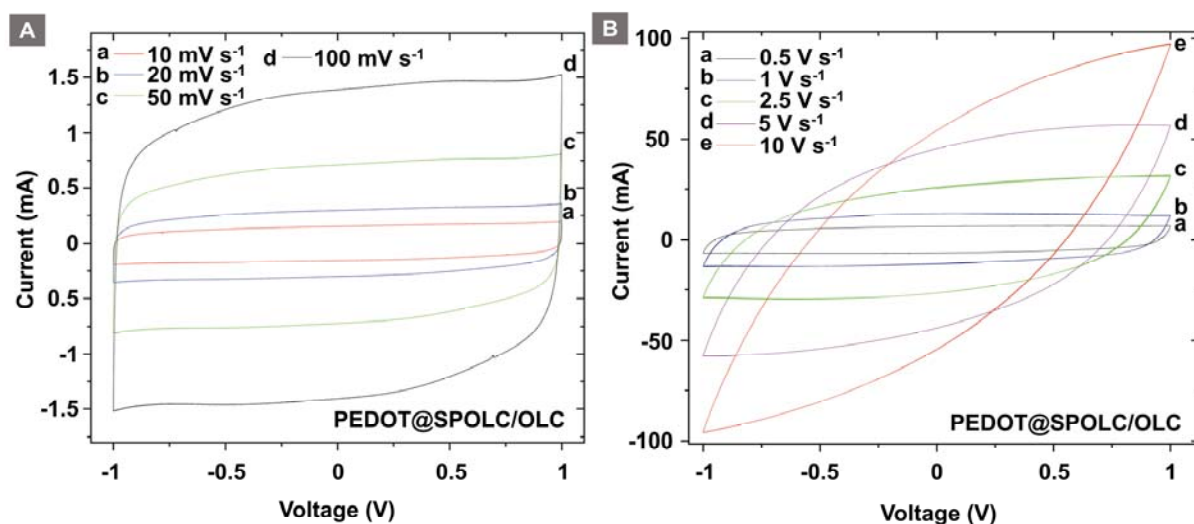

**Fig. S5:** Cyclic voltammogram with 1 V potential window of **PEDOT@SPOLC/OLC** at low (A) and high (B) scan rates.

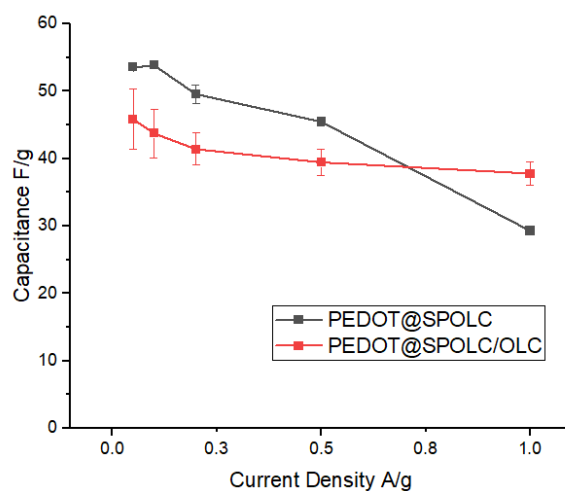

**Fig. S6:** Discharge capacitance of **PEDOT@SPOLC** and **PEDOT@SPOLC/OLC**

**Tab. S2:** Additional information on capacitances and conductivities of polymer-carbon composite materials

| Material composition                                     | conductivity                  | capacitance                                      | reference |
|----------------------------------------------------------|-------------------------------|--------------------------------------------------|-----------|
| optimized PEDOT film                                     | 6529 S cm <sup>-1</sup>       | 0.99 F cm <sup>-2</sup><br>(PEDOT:PSS electrode) | [S1]      |
| PEDOT on textile carbon fibres                           | 790 S cm <sup>-1</sup>        | 184 F g <sup>-1</sup>                            | [S2]      |
| polyvinyl alcohol-graphene oxide fibre coated with PEDOT | n.r.                          | 224 F g <sup>-1</sup>                            | [S3]      |
| Carbon nanooxions + resorcinol-formaldehyde resin        | n.r.                          | 160 F g <sup>-1</sup>                            | [S4]      |
| Carbon nanooxions / PEDOT:PSS 1:1                        | n.r.                          | 95 Fg <sup>-1</sup>                              | [S5]      |
| PEDOT:PSS with EDOT:PSS 1:11                             | 1000 S cm <sup>-1</sup>       |                                                  | [S6]      |
| PEDOT:PSS film + Triton X-100                            | up to 1880 S cm <sup>-1</sup> |                                                  | [S7]      |

n.r.: not reported

Several benchmark numbers for the conductivity of different PEDOT containing devices have been reported in the literature. Ranging from 1000 S/cm [15] to 6200 S/cm [1]. This changes when the PEDOT is incorporated into nanomaterial composites. As an example, PEDOT on textile carbon fibers showed a conductivity of 790 S/cm [5]. While not directly measured, we assume reduced electrical conductivity for our system as well.

Another CNO/PEDOT:PSS composite, consisting of a 1:1 ratio of carbon material and polymer, was reported to achieve capacitances of up to 95 F/g [27], compared to our **PEDOT@OLC** with a capacitance of 77 F/g.

[S1] H.-W. Chen, C. Li, *Chin. J. Polym. Sci.* 38(5) (2020) 435-448.

<https://doi.org/10.1007/s10118-020-2373-2>

[S2] F. Niu, R. Guo, L. Dang, J. Sun, Q. Li, X. He, Z. Liu, Z. Lei, *ACS Appl. Energy Mater.* 3(8) (2020) 7794-7803. <https://doi.org/10.1021/acsaem.0c01202>

[S3] M. A. A. M. Abdah, N. A. Zubair, N. H. N. Azman, Y. Sulaiman, *Mater. Chem. Phys.* 192 (2017) 161-169. <https://doi.org/10.1016/j.matchemphys.2017.01.058>

[S4] G. Siemiaszko, J. Breczko, A. Hryniewicka, A. Ilnicka, K. H. Markiewicz, A. P. Terzyk, M. E. Plonska-Brzezinska, *Sci. Rep.* 13 (2023) 6606. <https://doi.org/10.1038/s41598-023-33874-w>.

[S5] M. Plonska-Brzezinska, M. Lewandowski, M. Błaszcyk, A. Molina-Ontoria, T. Luciński, L. Echegoyen, *ChemPhysChem*. 13(18) (2012) 4134-4141.

<https://doi.org/10.1002/cphc.201200789>

[S6] P. Sakunpongpitorn, K. Phasuksom, N. Paradee, A. Sirivat, *RSC Adv*. 9(11) (2019) 6363-6378. <https://doi.org/10.1039/c8ra08801b>
